# Supplementary material for: The structure, carbon deposition and stability of a ZrOx/Ni–MnOx/SiO2 catalyst for the CO2 reforming of methane
Source: Royal Society of Chemistry journal article supplement (doi:10.1039/c5ra19195e), 2015-01-01
Supplement: c5ra19195e1.pdf [file c5ra19195e1.pdf]

# The Structure, Carbon Deposition and Stability of a ZrO<sub>x</sub>/Ni-MnO<sub>x</sub>/SiO<sub>2</sub> Catalyst for the CO<sub>2</sub> Reforming of Methane†

Lu Yao, Jia Shi and Changwei Hu\*

*Key Laboratory of Green Chemistry and Technology, Ministry of Education, College of  
Chemistry, Sichuan University, Chengdu, Sichuan, 610064, China.*

## Electronic Supplementary Information (ESI)

### Contents

**Fig. S1** XRD patterns of Zr and Mn co-promoted catalysts reduced at 800 °C.

**Fig. S2** A) H<sub>2</sub>-TPH after CH<sub>4</sub>-TPDe and B) the subsequent O<sub>2</sub>-TPO on  
different catalysts.

**Fig. S3** SEM images of different catalysts. a-e) after CH<sub>4</sub>-TPDe, f-j) after CO<sub>2</sub>-TPO,  
k-o) after O<sub>2</sub>-TPO and p-r) after 60 h DRM reaction. a),f) and k) Ni-ZrO<sub>x</sub>/SiO<sub>2</sub>  
catalyst; b), g) and l) Ni-MnO<sub>x</sub>/SiO<sub>2</sub> catalyst; c), h), l) and p) Ni-MnO<sub>x</sub>-ZrO<sub>x</sub>/SiO<sub>2</sub>  
catalyst; d), i), n) and q) MnO<sub>x</sub>/Ni-ZrO<sub>x</sub>/SiO<sub>2</sub> catalyst; e), g), o) and r) ZrO<sub>x</sub>/Ni-  
MnO<sub>x</sub>/SiO<sub>2</sub> catalyst.

**Table S1** Elemental analysis results for the fresh Zr and Mn co-promoted catalysts, as  
determined by XPS.

**Table S2** BET surface area, metal particle size and ICP analysis of the Mn and Zr  
co-promoted catalysts.

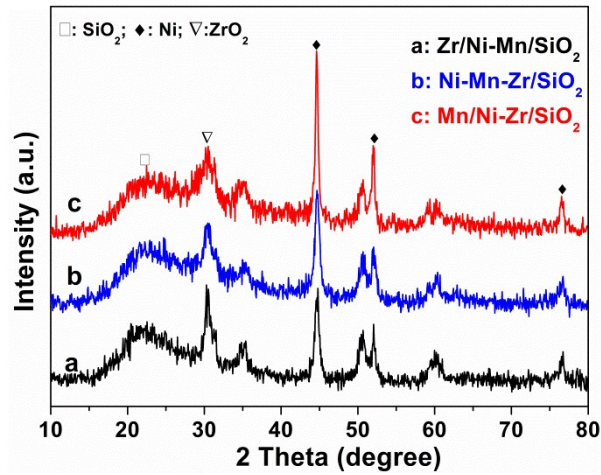

**Fig. S1** XRD patterns of Zr and Mn co-promoted catalysts reduced at 800 °C.

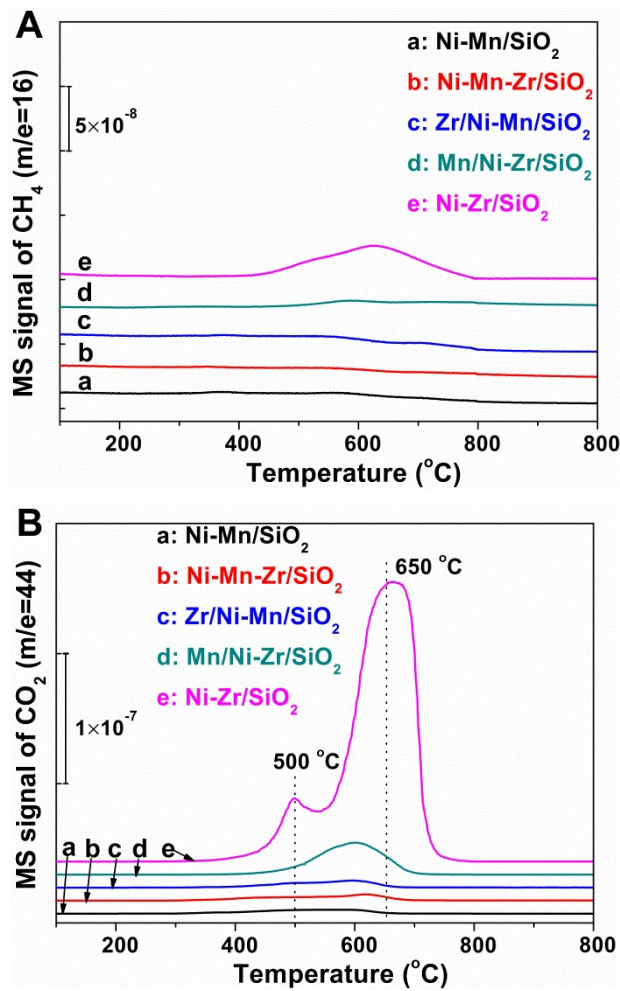

**Fig. S2** A)  $\text{H}_2$ -TPH after  $\text{CH}_4$ -TPDe and B) the subsequent  $\text{O}_2$ -TPO on different catalysts.

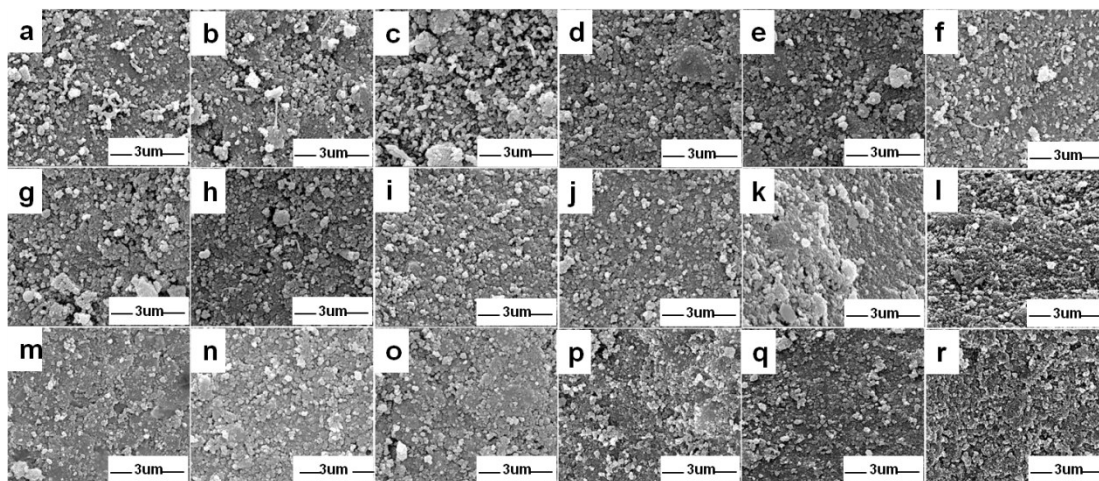

**Fig. S3** SEM images of different catalysts. a-e) after CH<sub>4</sub>-TPDe, f-j) after CO<sub>2</sub>-TPO, k-o) after O<sub>2</sub>-TPO and p-r) after 60 h DRM reaction. a),f) and k) Ni-ZrO<sub>x</sub>/SiO<sub>2</sub> catalyst; b), g) and l) Ni-MnO<sub>x</sub>/SiO<sub>2</sub> catalyst; c), h), l) and p) Ni-MnO<sub>x</sub>-ZrO<sub>x</sub>/SiO<sub>2</sub> catalyst; d), i), n) and q) MnO<sub>x</sub>/Ni-ZrO<sub>x</sub>/SiO<sub>2</sub> catalyst; e), g), o) and r) ZrO<sub>x</sub>/Ni-MnO<sub>x</sub>/SiO<sub>2</sub> catalyst.

**Table S1** Elemental analysis results for the fresh Zr and Mn co-promoted catalysts, as determined by XPS.

| Sample                                                  | Ni % | Zr % | Mn % |
|---------------------------------------------------------|------|------|------|
| Ni-MnO <sub>x</sub> -ZrO <sub>x</sub> /SiO <sub>2</sub> | 37.3 | 43.2 | 19.5 |
| MnO <sub>x</sub> /Ni-ZrO <sub>x</sub> /SiO <sub>2</sub> | 39.4 | 13.3 | 47.3 |
| ZrO <sub>x</sub> /Ni-MnO <sub>x</sub> /SiO <sub>2</sub> | 46.2 | 7.6  | 46.2 |

**Table S2** BET surface area, metal particle size and ICP analysis of the Mn and Zr co-promoted catalysts.

| Sample                                                  | BET surface area (m <sup>2</sup> g <sup>-1</sup> ) | Metal particle size <sup>a</sup> (nm) | Ni Dispersion <sup>b</sup> (%) | Elemental ratio <sup>c</sup> (wt%) |     |     |
|---------------------------------------------------------|----------------------------------------------------|---------------------------------------|--------------------------------|------------------------------------|-----|-----|
|                                                         |                                                    |                                       |                                | Mn                                 | Zr  | Ni  |
| Ni-MnO <sub>x</sub> -ZrO <sub>x</sub> /SiO <sub>2</sub> | 136                                                | 12                                    | 0.047                          | 1.1                                | 4.2 | 8.4 |
| MnO <sub>x</sub> /Ni-ZrO <sub>x</sub> /SiO <sub>2</sub> | 100                                                | 18                                    | 0.065                          | 1.1                                | 4.0 | 7.8 |
| ZrO <sub>x</sub> /Ni-MnO <sub>x</sub> /SiO <sub>2</sub> | 108                                                | 12                                    | 0.079                          | 1.2                                | 3.9 | 8.1 |

<sup>a</sup> Determined from XRD. <sup>b</sup> Ni surface exposure measured from CO chemisorption. <sup>c</sup> Determined from ICP analysis.
